# Supplementary material for: Development and validation of a sensitive LC-MS/MS method for pioglitazone: application towards pharmacokinetic and tissue distribution study in rats
Source: PubMed Central journal article supplement (PMC8695949; doi:10.1039/d1ra01126j), 2021-03-18
Supplement: RA-011-D1RA01126J-s001.pdf [file RA-011-D1RA01126J-s001.pdf]

## **Development and validation of a sensitive LC-MS/MS method for Pioglitazone: Application towards pharmacokinetic and tissue distribution study in rats**

**Kusuma Kumari G<sup>a</sup>; Praveen Thaggikuppe Krishnamurthy\*<sup>a</sup>; Ammu V. V. V. Ravi  
Kiran<sup>a</sup>; Vishwanath Kurawattimath<sup>b</sup>; Narendran S.T<sup>c</sup>; Babu B<sup>c</sup>; Krishnaveni Nagappan<sup>c</sup>**

<sup>a</sup> Department of Pharmacology, JSS College of Pharmacy, JSS Academy of Higher Education & Research, Ooty, Nilgiris, Tamil Nadu- 643001, India.

<sup>b</sup> Drug Metabolism and Pharmacokinetics-Toxicology Division, Sai Advantium Pharma Ltd., Pune- 411 057, India

<sup>c</sup> Department of Pharmaceutical Analysis, JSS College of Pharmacy, JSS Academy of Higher Education & Research, Ooty, Nilgiris, Tamil Nadu- 643001, India.

\*Corresponding author: Dr. Praveen Thaggikuppe Krishnamurthy

Professor and Head

Department of Pharmacology

JSS College of Pharmacy, Ooty

e-mail: [praveentk7812@gmail.com](mailto:praveentk7812@gmail.com), [praveentk@jssuni.edu.in](mailto:praveentk@jssuni.edu.in)

**Table S-I: A staggering collection of blood and tissue samples for pharmacokinetic studies of PGZ in rats**

| <b>Animals</b> | <b>0 hrs</b> | <b>0.5hrs</b> | <b>1hrs</b> | <b>3 hrs</b> | <b>5hrs</b> | <b>7 hrs</b> | <b>24 hrs</b> |
|----------------|--------------|---------------|-------------|--------------|-------------|--------------|---------------|
| 1              | B            | B             | NC          | B            | NC          | B            | B             |
| 2              | B            | B             | NC          | B            | NC          | B            | T             |
| 3              | B            | B             | NC          | B            | NC          | B            | T             |
| 4              | B            | B             | NC          | B            | NC          | T            | X             |
| 5              | B            | B             | NC          | T            | NC          | X            | X             |
| 6              | B            | T             | X           | X            | X           | X            | X             |
| 7              | B            | NC            | B           | NC           | B           | B            | B             |
| 8              | B            | NC            | B           | NC           | B           | B            | T             |
| 9              | B            | NC            | B           | NC           | B           | B            | T             |
| 10             | B            | NC            | B           | NC           | B           | T            | X             |
| 11             | B            | NC            | B           | NC           | T           | X            | X             |
| 12             | B            | NC            | T           | X            | X           | X            | X             |

**B:** blood; **T:** tissues; **NC:** no collection; **X:** None

**Table S-II: Mobile phase compositions used for LC-MS/MS method development**

| S.No | Organic phase    |          | Aqueous phase | Aqueous: organic Ratio | Inference                   |
|------|------------------|----------|---------------|------------------------|-----------------------------|
| 1.   | Ammonium acetate | 1mM      | Acetonitrile  | 50:50                  | Peak tailing and Spilt peak |
|      |                  | 2mM      |               | 60:40                  |                             |
|      |                  | 3mM      |               | 70:30                  |                             |
|      |                  | 4mM      |               | 80:20                  |                             |
|      |                  | 5mM      |               | 90:10                  |                             |
| 2.   | Ammonium formate | 1mM      | Acetonitrile  | 50:50                  | Peak tailing and fronting   |
|      |                  | 2mM      |               | 60:40                  |                             |
|      |                  | 3mM      |               | 70:30                  |                             |
|      |                  | 4mM      |               | 80:20                  |                             |
|      |                  | 5mM      |               | 90:10                  |                             |
| 3.   | Acetic acid      | 0.1% v/v | Acetonitrile  | 50:50                  | Spilt peak and Peak tailing |
|      |                  | 0.5% v/v |               | 60:40                  |                             |
|      |                  | 1% v/v   |               | 70:30                  |                             |
|      |                  | 2% v/v   |               | 80:20                  |                             |
|      |                  | 3% v/v   |               | 90:10                  |                             |
| 4.   | Formic acid      | 0.1% v/v | Acetonitrile  | 50:50                  | Fronting                    |
|      |                  |          |               | 60:40                  | Peak tailing                |
|      |                  |          |               | 70:30                  | Peak tailing                |
|      |                  |          |               | 80:20                  | Peak tailing                |
|      |                  |          |               | 90:10                  | Peak tailing                |
|      |                  |          |               | 95:05                  | Good peak                   |

**Table S-III: Comparison of various methods available for the estimation of Pioglitazone in biological matrices**

| Authors            | Species and Biological matrix | Pharmacokinetics data    |                       |                       |                        | Various method                               | Method validation       |                                 |                                |            |           | Collision energy (eV) | Run time (min) | Retention Time (Min) | Ref. |
|--------------------|-------------------------------|--------------------------|-----------------------|-----------------------|------------------------|----------------------------------------------|-------------------------|---------------------------------|--------------------------------|------------|-----------|-----------------------|----------------|----------------------|------|
|                    |                               | C <sub>max</sub> (ng/ml) | t <sub>1/2</sub> (hr) | T <sub>max</sub> (hr) | AUC (0-24 hrs) ng/h/ml |                                              | Linearity range (ng/ml) | Precision (Intra & Inter day) % | Accuracy (Intra & inter day) % | LLOQ ng/ml | LOD ng/ml |                       |                |                      |      |
| Gananadhamu et al. | RP                            | 6062                     | 4.9                   | 1.5                   | 55116                  | LC-ESI-MS/MS (SM-Sitagliptin)                | 8 - 1571                | 9.5-9.8 & 6.1-6.5               | 101.0-102.8 & 96.3-98.2        | 8.2        | -         | 39                    | 5              | 2.81                 | (1)  |
| Elgawish et al.    | RP                            | 1920                     | 10.8                  | 1.0                   | 18214                  | LC-MS/MS (SM-metformin)                      | 1 - 2500                | 0.6-14.3 & 0.6-10.3             | 95.8-104.6 & 93.2-95.5         | 14.7       | 0.95      | 40                    | 15             | 14.72                | (2)  |
| Sengupta et al.    | RP                            | 3870                     | -                     | 3.6                   | 4158                   | LC-MS/MS (SM-Telmisartan)                    | 5-10000                 | 3.1 -6.7 & 5.6 -8.1             | 94.2-106.1 & 92.3-98.9         | 5.00       | -         | 40                    | -              | -                    | (3)  |
| Abdel-Ghany et al. | HP                            | 1462                     | 5.9                   | 1.5                   | 12178                  | LC-MS/MS (SM-Alogliptin)                     | 25-2000                 | 2.5 - 1.4 & 1.9-0.5             | 99.4-100.4 & 94.6-97.4         | 25.0       | -         | 40                    | -              | -                    | (4)  |
| Hess et al.        | HP                            | -                        | -                     | -                     | -                      | LC-MS (SM-Hydroxy tolbutamide, Vildagliptin) | 1-750                   | 5.4 -10.1 & 8.9-13.0            | 96.4-100.5 & 94.9-98.6         | 25.0       | -         | 43                    | -              | -                    | (5)  |
| Jagadeesh et al.   | HP                            | 709                      | -                     | 4.5                   | 20640                  | LC-MS (SM-Metformin)                         | 15-2500                 | 13.2-15.1 & 41.8-42.7           | 88.0-97.4 & 84.3-89.5          | 15.0       | -         | 55                    | 4              | 2.6                  | (6)  |
| Zhang et al.       | DP                            | 2,640                    | 5.8                   | 0.9                   | 7121.9                 | LC-MS/MS (SM-Metformin)                      | 1-1000                  | 9.6 & 6.5 & 9.7-6.8             | 90.7-101.6 & 89.6-94.3         | 1.0        | 0.50      | 31                    | 8              | 6.1                  | (7)  |
| Sengupta et al.    | HP                            | -                        | -                     | -                     | -                      | LC-MS/MS (SM)-Glimepride                     | 2-1000                  | 2.5-2.7& 2.6-2.7                | 96.0-105.1 & 94.3-97.0         | 2.5        | -         | 60                    | 6              | 2.71                 | (3)  |
| Khadiga et al.     | HP                            | 1847                     | 8.8                   | 3.7                   | 26572                  | LC-MS/MS (SM-Aloglitpin)                     | 10-3000                 | 10-10.6 & 9.6-10                | 96.6-103.3 & 90.2-97.6         | 10         | -         | 60                    | -              | 3.01                 | (8)  |
| Current method     | RP                            | 495                      | 5.6                   | 1.0                   | 1056                   | LC-MS/MS                                     | 1-500                   | 6.0-8.1 & 7.5-9.8               | 93.2-97.6 & 95.8-98.7          | 1.0        | 0.50      | 30                    | 4              | 2.45                 | --   |
|                    | RA                            | 247                      | 4.38                  | 1.0                   | 666                    |                                              |                         | 5.2-7.0 & 6.0-8.0               | 93.7-98.3 & 91.9-              |            |           |                       |                |                      |      |

|  |     |     |      |     |      |  |  |                                |                              |  |  |  |  |  |  |
|--|-----|-----|------|-----|------|--|--|--------------------------------|------------------------------|--|--|--|--|--|--|
|  |     |     |      |     |      |  |  |                                | 97.6                         |  |  |  |  |  |  |
|  | RH  | 125 | 5.16 | 3.0 | 780  |  |  | 6.1-8.2 &<br>6.8-8.9           | 88.8-92.8<br>& 87.7-<br>90.9 |  |  |  |  |  |  |
|  | RB  | 24. | 4.37 | 5.0 | 194  |  |  | 6.2-10.1 &<br>9.5-11.6         | 89.9-91.0<br>& 87.6-<br>90.0 |  |  |  |  |  |  |
|  | RK  | 95  | 2.78 | 3.1 | 3969 |  |  | 6.7-8.4 &-<br>7.4-10.1         | 95.0-96.8<br>& 94.9-<br>96.0 |  |  |  |  |  |  |
|  | RBr | 39  | 2.75 | 3.1 | 166  |  |  | 6.64-<br>8.51%&7.69-<br>10.14% | 93.4-95.6<br>& 91.7-<br>95.0 |  |  |  |  |  |  |

AUC – Area Under curve; LLOQ – Lower limit of Quantification; ESI- Electron Spray Ionization, SM- Simultaneous method, RP- Rat plasma, RA- Rat adipose tissue, RH- Rat heart, RB-Rat bone, RK- Rat kidney, RBr- Rat brain, HP- Human plasma, DP- Dog plasma.

1. Gananadhamu S, Laxmikanth V, Shantikumar S, Sridhar V, Geetha C, Sandhya C. Rapid LC-ESI-MS-MS Method for the Simultaneous Determination of Sitagliptin and Pioglitazone in Rat Plasma and Its Application to Pharmacokinetic Study. *American Journal of Analytical Chemistry*. 2012;03(12):849-58.
2. Elgawish MS, Nasser S, Salama I, Abbas AM, Mostafa SM. Liquid chromatography tandem mass spectrometry for the simultaneous determination of metformin and pioglitazone in rat plasma: Application to pharmacokinetic and drug-drug interaction studies. *Journal of Chromatography B*. 2019;1124:47-57.
3. Sengupta P, Chatterjee B, Mandal UK, Gorain B, Pal TK. Development and validation of a high throughput LC-MS/MS method for simultaneous quantitation of pioglitazone and telmisartan in rat plasma and its application to a pharmacokinetic study. *Journal of Pharmaceutical Analysis*. 2017;7(6):381-7.
4. Abdel-Ghany MF, Ayad MF, Tadros MM. Enhanced LC-MS/MS analysis of alogliptin and pioglitazone in human plasma: Applied to a preliminary pharmacokinetic study. *Journal of Chromatography B*. 2017;1058:93-101.
5. Hess C, Musshoff F, Madea B. Simultaneous identification and validated quantification of 11 oral hypoglycaemic drugs in plasma by electrospray ionisation liquid chromatography-mass spectrometry. *Analytical and Bioanalytical Chemistry*. 2011;400(1):33-41.
6. Jagadeesh B, Bharathi DV, Pankaj C, Narayana VS, Venkateswarulu V. Development and validation of highly selective and robust method for simultaneous estimation of pioglitazone, hydroxypioglitazone and metformin in human plasma by LC-MS/MS: Application to a pharmacokinetic study. *Journal of Chromatography B*. 2013;930:136-45.
7. Zhang X, Peng Y, Wan P, Yin L, Wang G, Sun J. Simultaneous Determination and Pharmacokinetic Study of Metformin and Pioglitazone in Dog Plasma by LC-MS-MS. *Journal of Chromatographic Science*. 2013;52(1):52-8.
8. Kelani KM, Rezk MR, Badran OM, Elghobashy MR. Determination of pioglitazone, its metabolite and alogliptin in human plasma by a novel LC-MS/MS method; application to a pharmacokinetic study. *Journal of Chromatography B: Analytical Technologies in the Biomedical and Life Sciences*. 2019;1132.
